# Supplementary material
Source: PubMed Central journal article supplement (PMC6460462)
Supplement: NIHMS1011795-supplement-S_1-S_10.pdf [file NIHMS1011795-supplement-S_1-S_10.pdf]

**Table S.1.** Rates of missingness (percentages) for all measures/variables.

| Construct     | Measure/Variable     | Rater    | Age | % Missing |
|---------------|----------------------|----------|-----|-----------|
| Dysregulation | CBCL                 | Mother   | 5   | 3         |
|               | CBCL                 | Mother   | 6   | 16        |
|               | CBCL                 | Mother   | 7   | 21        |
|               | CBCL                 | Mother   | 8   | 19        |
|               | CBCL                 | Mother   | 9   | 28        |
|               | CBCL                 | Mother   | 10  | 32        |
|               | CBCL                 | Mother   | 11  | 23        |
|               | CBCL                 | Mother   | 12  | 22        |
|               | CBCL                 | Mother   | 13  | 27        |
| Dysregulation | CBCL                 | Teacher  | 5   | 2         |
|               | CBCL                 | Teacher  | 6   | 8         |
|               | CBCL                 | Teacher  | 7   | 12        |
|               | CBCL                 | Teacher  | 8   | 15        |
|               | CBCL                 | Teacher  | 9   | 20        |
|               | CBCL                 | Teacher  | 10  | 23        |
|               | CBCL                 | Teacher  | 11  | 24        |
|               | CBCL                 | Teacher  | 12  | 27        |
|               | CBCL                 | Teacher  | 13  | 31        |
| Dysregulation | CBCL                 | Max      | 5   | 1         |
|               | CBCL                 | Max      | 6   | 6         |
|               | CBCL                 | Max      | 7   | 9         |
|               | CBCL                 | Max      | 8   | 11        |
|               | CBCL                 | Max      | 9   | 16        |
|               | CBCL                 | Max      | 10  | 19        |
|               | CBCL                 | Max      | 11  | 19        |
|               | CBCL                 | Max      | 12  | 20        |
|               | CBCL                 | Max      | 13  | 23        |
| Temperament   | Unadaptable          | Mother   | 5   | 5         |
|               | Difficult            | Mother   | 5   | 5         |
|               | Resistant to Control | Mother   | 5   | 5         |
| Parenting     | Parental Warmth      | Observer | 5   | 9         |
|               | Harsh Control        | Mother   | 5   | 1         |
|               | Effective Control    | Mother   | 5   | 1         |
|               | Reactive Parenting   | Mother   | 5   | 5         |
|               | Proactive Parenting  | Mother   | 5   | 6         |

| Construct | Measure | Rater | Age | % Missing |
|-----------|---------|-------|-----|-----------|
|-----------|---------|-------|-----|-----------|

|                        |                                |        |                  |    |
|------------------------|--------------------------------|--------|------------------|----|
| Stress                 | CAQ Sum                        | Mother | 5                | 1  |
|                        | CAQ Sum                        | Mother | 6                | 14 |
|                        | CAQ Sum                        | Mother | 7                | 18 |
|                        | CAQ Sum                        | Mother | 8                | 18 |
|                        | CAQ Sum                        | Mother | 9                | 27 |
|                        | CAQ Sum                        | Mother | 10               | 31 |
|                        | CAQ Sum                        | Mother | 11               | 21 |
|                        | CAQ Sum                        | Mother | 12               | 24 |
|                        | CAQ Sum                        | Mother | 13               | 26 |
| Language Ability       | Standardized Tests             | Self   | 7-13             | 8  |
| Social Preference      | Sociometric Ratings            | Peers  | 5-8              | 38 |
| Friendship Outcomes    | Best Friend                    | Self   | 19-20 &<br>22-24 | 9  |
|                        | Quality of Friendship          | Self   | 19-20            | 21 |
| Employment & Education | Employment Status              | Self   | 19-24            | 6  |
|                        | Longest Period of Unemployment | Self   | 19-24            | 36 |
|                        | Highest Educational Attainment | Self   | 19-24            | 34 |
| Criminality            | Arrested                       | Self   | 27               | 21 |
|                        | Age at First Arrest            | Self   | 27               | 77 |
|                        | Convicted                      | Self   | 27               | 77 |
| Psychiatric Outcomes   | Use of SACA Services           | Self   | 22-24            | 20 |
|                        | Problems Due to Drugs          | Self   | 27               | 26 |
|                        | Suicidality                    | Self   | 20-24            | 9  |
|                        | DSM-IV Diagnoses               | Self   | 18               | 25 |
|                        | DSM-IV Internalizing Diagnoses | Self   | 18               | 28 |
|                        | DSM-IV Externalizing Diagnoses | Self   | 18               | 25 |

*Note:* Max dysregulation refers to the combined report of mother and teacher ratings using the highest score per item. CAQ refers to the Changes and Adjustments Questionnaire, and CBCL refers to the Child Behavior Checklist. Age at first arrest and conviction were not applicable for the majority of respondents, resulting in the highest rate of missingness (77%) observed across measures.

**Table S.2.** Descriptives of Dysregulation by Reporter at Each Age

| Rater         | Age | N   | Mean (sd)  | Range  |
|---------------|-----|-----|------------|--------|
| Mother        | 5   | 567 | 1.04 (.64) | 0-3.68 |
| Mother        | 6   | 491 | 0.97 (.68) | 0-3.65 |
| Mother        | 7   | 463 | 0.95 (.68) | 0-3.51 |
| Mother        | 8   | 473 | 0.93 (.75) | 0-4.34 |
| Mother        | 9   | 421 | 0.94 (.71) | 0-4.47 |
| Mother        | 10  | 396 | 0.93 (.78) | 0-4.29 |
| Mother        | 11  | 451 | 0.9 (.72)  | 0-4.56 |
| Mother        | 12  | 459 | 0.98 (.75) | 0-3.97 |
| Mother        | 13  | 428 | 0.96 (.76) | 0-4.11 |
| Teacher       | 5   | 574 | 0.6 (.64)  | 0-3.23 |
| Teacher       | 6   | 537 | 0.8 (.82)  | 0-3.77 |
| Teacher       | 7   | 517 | 0.8 (.80)  | 0-4.46 |
| Teacher       | 8   | 498 | 0.82 (.84) | 0-4.65 |
| Teacher       | 9   | 468 | 0.74 (.78) | 0-4.53 |
| Teacher       | 10  | 448 | 0.82 (.85) | 0-4.88 |
| Teacher       | 11  | 444 | 0.78 (.83) | 0-4.16 |
| Teacher       | 12  | 426 | 0.74 (.78) | 0-3.73 |
| Teacher       | 13  | 403 | 0.78 (.85) | 0-4.10 |
| Maximum Score | 5   | 582 | 1.33 (.76) | 0-4.74 |
| Maximum Score | 6   | 550 | 1.33 (.88) | 0-4.18 |
| Maximum Score | 7   | 531 | 1.3 (.87)  | 0-4.45 |
| Maximum Score | 8   | 520 | 1.32 (.95) | 0-4.82 |
| Maximum Score | 9   | 491 | 1.21 (.9)  | 0-4.71 |
| Maximum Score | 10  | 474 | 1.23 (.95) | 0-4.95 |
| Maximum Score | 11  | 475 | 1.28 (.9)  | 0-4.58 |
| Maximum Score | 12  | 468 | 1.3 (.88)  | 0-4.27 |
| Maximum Score | 13  | 449 | 1.28 (.92) | 0-4.48 |

**Table S.3.** Descriptives of Functional Outcomes and Psychiatric Disorders

| Continuous Outcomes                   | N (%) <sup>a</sup> | Mean (sd)    |
|---------------------------------------|--------------------|--------------|
| Best Friend                           | 532 (90.94)        | 0.84 (0.23)  |
| Quality of Friendship                 | 462 (78.97)        | 4.50 (4.62)  |
| Employment Status                     | 551 (94.19)        | 1.53 (0.44)  |
| Longest Period of Unemployment        | 374 (63.93)        | 9.75 (20.76) |
| Highest Educational Attainment        | 386 (65.98)        | 2.16 (1.18)  |
| Use of SACA Services                  | 470 (80.34)        | 0.15 (0.41)  |
| Problems Due to Drugs                 | 434 (74.19)        | 3.16 (4.33)  |
| Suicidality                           | 532 (90.94)        | 0.22 (0.66)  |
| Arrested                              | 461 (78.80)        | 0.30 (0.46)  |
| Age at First Arrest                   | 132 (22.65)        | 19.50 (4.11) |
| Convicted                             | 135 (23.08)        | 0.55 (0.50)  |
| DSM-IV Diagnoses                      | 436 (74.53)        | 1.71 (2.44)  |
| DSM-IV Diagnoses (Internalizing Only) | 419 (71.62)        | 0.61 (1.28)  |
| DSM-IV Diagnoses (Externalizing Only) | 436 (74.53)        | 1.13 (1.66)  |

*Note.* N reflects the total sample of respondents for each outcome measure.

<sup>a</sup> Percentages based on total sample of participants (n=585).

**Table S.4.** Heat Map Correlations of Dysregulation, Externalizing, and Internalizing Scales with Predictors

|          | Resistant<br>Temperament | Unadaptable<br>Temperament | Difficult<br>Temperament | Proactive<br>Parenting | Reactive<br>Parenting | Harsh<br>Parenting | Warmth<br>Observation | Effective<br>Control | Stress | Peer<br>Acceptance | Language<br>Ability |
|----------|--------------------------|----------------------------|--------------------------|------------------------|-----------------------|--------------------|-----------------------|----------------------|--------|--------------------|---------------------|
| M5 DP    | 0.34                     | 0.05                       | 0.29                     | -0.05                  |                       | 0.08               | -0.06                 |                      | 0.18   | -0.19              | -0.04               |
| M6 DP    | 0.29                     |                            | 0.23                     |                        | 0.03^                 | 0.06               | -0.10                 |                      | 0.25   | -0.22              | -0.10               |
| M7 DP    | 0.25                     |                            | 0.19                     | -0.09                  |                       | 0.12               | -0.07                 |                      | 0.24   | -0.31              | -0.14               |
| M8 DP    | 0.32                     | 0.05                       | 0.21                     |                        |                       | 0.08               | -0.11                 | 0.05                 | 0.24   | -0.37              | -0.16               |
| M9 DP    | 0.30                     |                            | 0.14                     | 0.03^                  | 0.09                  | 0.07               | -0.04                 | 0.12                 | 0.29   | -0.34              | -0.12               |
| M10 DP   | 0.31                     | 0.03^                      | 0.23                     | -0.03^                 | 0.10                  | 0.14               | -0.10                 | 0.03                 | 0.26   | -0.32              | -0.22               |
| M11 DP   | 0.27                     | 0.03                       | 0.19                     | 0.03                   | 0.08                  | 0.06               |                       | 0.06                 | 0.27   | -0.37              | -0.13               |
| M12 DP   | 0.28                     | -0.04                      | 0.12                     |                        |                       | 0.08               | -0.05                 | 0.05                 | 0.30   | -0.34              | -0.20               |
| M13 DP   | 0.28                     |                            | 0.16                     | 0.03                   | -0.03^                | 0.12               | -0.04                 |                      | 0.24   | -0.31              | -0.10               |
| T5 DP    | 0.12                     | -0.05                      | 0.05                     | -0.05                  | 0.06                  | 0.05               | -0.10                 | 0.04                 | 0.11   | -0.43              | -0.29               |
| T6 DP    | 0.20                     | -0.03^                     | 0.07                     |                        | 0.07                  |                    | -0.05                 | 0.03^                | 0.13   | -0.52              | -0.31               |
| T7 DP    | 0.17                     | -0.11                      |                          | -0.16                  | 0.13                  | 0.05               | -0.04                 | 0.08                 | 0.12   | -0.47              | -0.35               |
| T8 DP    | 0.07                     | -0.11                      | -0.03                    | -0.05                  | 0.10                  | 0.09               | -0.06                 |                      | 0.13   | -0.51              | -0.39               |
| T9 DP    | 0.17                     | -0.08                      | 0.03^                    |                        |                       | 0.12               | -0.11                 | 0.03                 | 0.20   | -0.49              | -0.38               |
| T10 DP   | 0.14                     |                            | 0.05                     | -0.07                  | 0.03^                 | 0.04^              | -0.09                 | 0.07                 | 0.18   | -0.48              | -0.42               |
| T11 DP   | 0.17                     |                            | 0.09                     | -0.11                  |                       | 0.14               | -0.11                 |                      | 0.17   | -0.44              | -0.40               |
| T12 DP   | 0.13                     | -0.05                      |                          | -0.11                  |                       | 0.09               | -0.15                 | -0.04                | 0.17   | -0.45              | -0.46               |
| T13 DP   | 0.15                     | -0.07                      | 0.06                     |                        |                       | 0.09               | -0.13                 | -0.03^               | 0.14   | -0.39              | -0.42               |
| DP Max 5 | 0.31                     |                            | 0.24                     | -0.05                  | 0.03^                 | 0.10               | -0.10                 | 0.03                 | 0.18   | -0.34              | -0.18               |
| DP Max 6 | 0.30                     |                            | 0.18                     |                        | 0.05                  |                    | -0.10                 | -0.04                | 0.22   | -0.46              | -0.25               |
| DP Max 7 | 0.22                     | -0.06                      | 0.12                     | -0.15                  | 0.11                  | 0.06               | -0.08                 | 0.04                 | 0.21   | -0.44              | -0.30               |
| DP Max 8 | 0.21                     |                            | 0.11                     | -0.04                  | 0.10                  | 0.10               | -0.09                 |                      | 0.20   | -0.52              | -0.34               |
| DP Max 9 | 0.25                     | -0.03^                     | 0.11                     |                        | 0.05                  | 0.10               | -0.09                 | 0.06                 | 0.26   | -0.48              | -0.28               |
| DPMax10  | 0.25                     |                            | 0.16                     | -0.06                  | 0.06                  | 0.10               | -0.10                 | 0.06                 | 0.25   | -0.45              | -0.37               |
| DPMax11  | 0.25                     |                            | 0.16                     | -0.05                  | 0.04                  | 0.10               | -0.08                 |                      | 0.26   | -0.47              | -0.33               |
| DPMax12  | 0.23                     | -0.05                      | 0.07                     | -0.11                  |                       | 0.14               | -0.10                 |                      | 0.27   | -0.40              | -0.35               |
| DPMax13  | 0.23                     | -0.04                      | 0.11                     | 0.03                   |                       | 0.13               | -0.11                 | -0.03                | 0.22   | -0.43              | -0.29               |
| M5 EXT   | 0.38                     |                            | 0.27                     | -0.05                  |                       | 0.10               | -0.09                 | 0.05                 | 0.17   | -0.25              | -0.07               |
| M6 EXT   | 0.31                     | -0.04                      | 0.19                     |                        |                       | 0.11               | -0.10                 | 0.04                 | 0.24   | -0.25              | -0.15               |
| M7 EXT   | 0.27                     |                            | 0.16                     | -0.10                  | 0.10                  | 0.16               | -0.09                 | 0.05                 | 0.24   | -0.32              | -0.20               |
| M8 EXT   | 0.31                     | -0.03                      | 0.17                     | -0.03^                 | 0.07                  | 0.10               | -0.11                 | 0.09                 | 0.23   | -0.37              | -0.19               |
| M9 EXT   | 0.29                     |                            | 0.13                     |                        | 0.06                  | 0.13               | -0.08                 | 0.13                 | 0.30   | -0.34              | -0.18               |
| M10 EXT  | 0.31                     |                            | 0.19                     | -0.06                  | 0.06                  | 0.18               | -0.14                 | 0.08                 | 0.27   | -0.36              | -0.29               |
| M11EXT   | 0.27                     | -0.05                      | 0.15                     |                        | 0.06                  | 0.11               | -0.04                 | 0.11                 | 0.26   | -0.40              | -0.18               |
| M12 EXT  | 0.28                     | -0.06                      | 0.11                     | -0.04                  |                       | 0.11               | -0.08                 | 0.08                 | 0.29   | -0.36              | -0.24               |
| M13 EXT  | 0.30                     | -0.05                      | 0.16                     |                        | -0.03^                | 0.16               | -0.08                 | 0.04                 | 0.24   | -0.36              | -0.18               |

|         | Resistant<br>Temperament | Unadaptable<br>Temperament | Difficult<br>Temperament | Proactive<br>Parenting | Reactive<br>Parenting | Harsh<br>Parenting | Warmth<br>Observation | Effective<br>Control | Stress | Peer<br>Acceptance | Language<br>Ability |
|---------|--------------------------|----------------------------|--------------------------|------------------------|-----------------------|--------------------|-----------------------|----------------------|--------|--------------------|---------------------|
| T5 EXT  | 0.11                     | -0.05                      | 0.03                     | -0.07                  | -0.03 <sup>^</sup>    | 0.11               | -0.11                 | 0.10                 | 0.10   | -0.40              | -0.19               |
| T6 EXT  | 0.18                     | -0.04                      | 0.06                     | -0.04                  | 0.04                  | -0.04 <sup>^</sup> | -0.06                 | 0.07                 | 0.11   | -0.49              | -0.22               |
| T7 EXT  | 0.10                     | -0.12                      |                          | -0.13                  | 0.10                  | 0.04 <sup>^</sup>  | -0.04                 | 0.11                 | 0.11   | -0.46              | -0.28               |
| T8 EXT  | 0.11                     | -0.13                      |                          |                        | 0.05                  | 0.12               | -0.10                 | 0.06                 | 0.15   | -0.48              | -0.31               |
| T9 EXT  | 0.18                     | -0.09                      |                          | -0.10                  |                       | 0.13               | -0.09                 | 0.05                 | 0.19   | -0.45              | -0.34               |
| T10 EXT | 0.11                     | -0.04                      | 0.03                     | -0.06                  |                       | 0.04 <sup>^</sup>  | -0.06                 | 0.10                 | 0.18   | -0.40              | -0.35               |
| T11 EXT | 0.14                     |                            | 0.07                     | -0.10                  |                       | 0.10               | -0.08                 | 0.03 <sup>^</sup>    | 0.13   | -0.37              | -0.31               |
| T12 EXT | 0.10                     | -0.07                      |                          | -0.11                  |                       | 0.06               | -0.15                 |                      | 0.15   | -0.35              | -0.36               |
| T13 EXT | 0.11                     | -0.08                      | 0.05                     | -0.03 <sup>^</sup>     | -0.06                 | 0.08               | -0.14                 |                      |        |                    |                     |
| M5 INT  | 0.15                     | 0.12                       | 0.19                     | -0.04                  | -0.02 <sup>^</sup>    |                    |                       | -0.05                | 0.14   | 0.05               | 0.06                |
| M6 INT  | 0.11                     | 0.07                       | 0.14                     |                        |                       | -0.04 <sup>^</sup> | -0.06                 | -0.08                | 0.19   |                    |                     |
| M7 INT  | 0.07                     | 0.09                       | 0.10                     | -0.03 <sup>^</sup>     | 0.07                  |                    |                       | -0.05                | 0.17   | -0.10              |                     |
| M8 INT  | 0.16                     | 0.16                       | 0.19                     |                        |                       |                    | -0.09                 |                      | 0.21   | -0.15              | -0.05               |
| M9 INT  | 0.13                     | 0.08                       | 0.08                     | 0.08                   | 0.07                  |                    |                       |                      | 0.24   | -0.14              |                     |
| M10 INT | 0.20                     | 0.12                       | 0.22                     |                        | 0.06                  | 0.05               | -0.04                 | -0.03                | 0.22   | -0.09              | -0.09               |
| M11 INT | 0.16                     | 0.16                       | 0.18                     | 0.04                   | 0.05                  |                    |                       | 0.03                 | 0.23   | -0.12              |                     |
| M12 INT | 0.17                     | 0.04                       | 0.07                     | 0.03 <sup>^</sup>      |                       | 0.04 <sup>^</sup>  |                       | -0.04                | 0.26   | -0.17              | -0.09               |
| M13 INT | 0.13                     | 0.08                       | 0.06                     | 0.07                   |                       | 0.07               | -0.04                 | -0.05                | 0.22   | -0.12              |                     |
| T5 INT  | -0.03 <sup>^</sup>       | 0.03                       |                          | -0.04                  |                       | -0.09              | -0.05                 |                      | 0.06   | -0.05              | -0.08               |
| T6 INT  | 0.08                     | 0.07                       | 0.05                     | 0.05                   | -0.07                 | -0.09              | -0.03                 | -0.02 <sup>^</sup>   | 0.11   | -0.20              | -0.09               |
| T7 INT  | 0.10                     |                            |                          | -0.10                  | 0.10                  | -0.05              | -0.04                 |                      | 0.09   | -0.15              | -0.16               |
| T8 INT  | -0.04                    |                            |                          | -0.05                  | 0.10                  | 0.04 <sup>^</sup>  | -0.03 <sup>^</sup>    | -0.05                | 0.06   | -0.24              | -0.21               |
| T9 INT  | 0.03                     | 0.04                       | 0.06                     | 0.06                   |                       |                    | -0.05                 | -0.04                | 0.12   | -0.22              | -0.14               |
| T10 INT | 0.05                     | 0.05                       | 0.07                     |                        |                       |                    | -0.05                 | 0.04                 | 0.12   | -0.22              | -0.21               |
| T11 INT | 0.04                     |                            |                          | -0.06                  | 0.04                  | 0.06               | -0.12                 |                      | 0.18   | -0.22              | -0.21               |
| T12 INT | 0.05                     | 0.06                       |                          |                        | 0.05                  | 0.05               | -0.10                 |                      | 0.15   | -0.35              | -0.24               |
| T13 INT | 0.11                     |                            | 0.05                     |                        | 0.11                  | 0.15               | -0.07                 | -0.08                | 0.10   | -0.23              | -0.18               |

*Note:* All correlations at  $p < 0.05$ , two-tailed. Correlations trending towards significance are represented by <sup>^</sup>. Green represents stronger positive correlations, and red indicates stronger negative correlations. DP Max refers to the maximum score dysregulation profile for child ages 5-13, T DP refers to teacher-reported dysregulation profile, T INT refers to teacher-reported internalizing score, T EXT refers to teacher-reported externalizing, M DP refers to mother-reported dysregulation profile, M INT refers to mother-reported internalizing, and M EXT refers to mother-reported externalizing.

**Table S.5.** Intraclass Correlation Coefficients (ICCs) for Multilevel Models of Dysregulation

| Dysregulation Measure | Variance Between Children | Variance Within Children | ICC  |
|-----------------------|---------------------------|--------------------------|------|
| Mother Report         | 0.33                      | 0.18                     | 0.65 |
| Teacher Report        | 0.31                      | 0.34                     | 0.48 |
| Maximum Score         | 0.44                      | 0.34                     | 0.56 |

*Note.* The ICC is a measure of similarity between two randomly selected measurement points within a randomly chosen child. It reflects the proportion of the total variation in the outcome that is between individuals, or in other words, the proportion of the variance in the outcome explained by individual differences. It is calculated by dividing the variance between children by the total variance.

**Table S.6.** Model building process

|                                      | Maximum Score                                                                                                                                                                                                                                                                                                                                                                                                                                                                                                                                                                                                                                                                                                                                                                                          | Mother Report | Teacher Report |
|--------------------------------------|--------------------------------------------------------------------------------------------------------------------------------------------------------------------------------------------------------------------------------------------------------------------------------------------------------------------------------------------------------------------------------------------------------------------------------------------------------------------------------------------------------------------------------------------------------------------------------------------------------------------------------------------------------------------------------------------------------------------------------------------------------------------------------------------------------|---------------|----------------|
| <i>Temperament</i>                   |                                                                                                                                                                                                                                                                                                                                                                                                                                                                                                                                                                                                                                                                                                                                                                                                        |               |                |
| Difficult                            | +*                                                                                                                                                                                                                                                                                                                                                                                                                                                                                                                                                                                                                                                                                                                                                                                                     | +*            | --             |
| Resistant to control (RTC)           | +*                                                                                                                                                                                                                                                                                                                                                                                                                                                                                                                                                                                                                                                                                                                                                                                                     | +*            | +*             |
| Unadaptable                          | --                                                                                                                                                                                                                                                                                                                                                                                                                                                                                                                                                                                                                                                                                                                                                                                                     | --            | --             |
| Modeling decision                    | Higher RTC significantly predicted higher initial levels of dysregulation, across measures. Likelihood ratio tests showed significantly improved model fit with the inclusion of this predictor relative to a model with only the respective growth parameters (Max: $\chi^2 = 529.7$ , $df = 1$ , $p < 0.001$ ; Mother: $\chi^2 = 324.7$ , $df = 1$ , $p < 0.001$ ; Teacher: $\chi^2 = 418.1$ , $df = 1$ , $p < 0.001$ ).                                                                                                                                                                                                                                                                                                                                                                             |               |                |
| <i>Parenting Practices</i>           |                                                                                                                                                                                                                                                                                                                                                                                                                                                                                                                                                                                                                                                                                                                                                                                                        |               |                |
| Harsh                                | + *                                                                                                                                                                                                                                                                                                                                                                                                                                                                                                                                                                                                                                                                                                                                                                                                    | --            | --             |
| Reactive                             | --                                                                                                                                                                                                                                                                                                                                                                                                                                                                                                                                                                                                                                                                                                                                                                                                     | --            | --             |
| Proactive                            | --                                                                                                                                                                                                                                                                                                                                                                                                                                                                                                                                                                                                                                                                                                                                                                                                     | --            | -*             |
| Effective                            | --                                                                                                                                                                                                                                                                                                                                                                                                                                                                                                                                                                                                                                                                                                                                                                                                     | --            | --             |
| Warmth                               | --                                                                                                                                                                                                                                                                                                                                                                                                                                                                                                                                                                                                                                                                                                                                                                                                     | --            | -*             |
| Modeling decision                    | Parenting practices were not significantly associated with change in mother-reported dysregulation. Harsh parenting was significantly associated with growth in the maximum dysregulation score, and model fit improved with the inclusion of this predictor ( $\chi^2=4196.3$ , $df = 1$ , $p < 0.001$ ). Both proactive and warm parenting were associated with reductions in teacher-reported dysregulation. Based on the AIC and BIC fit statistics <sup>^</sup> , warmth was retained because lower values demonstrate better fit (AIC = 7613.8 and BIC = 7647.8 for warmth, AIC =7929.6 and BIC = 7963.9 for proactive). Model fit improved with the inclusion of this predictor, relative to the model with just temperament and growth parameters ( $\chi^2 = 604.4$ , $df = 1$ , $p < .001$ ) |               |                |
| <i>Stress</i>                        | --                                                                                                                                                                                                                                                                                                                                                                                                                                                                                                                                                                                                                                                                                                                                                                                                     | --            | --             |
| <i>Parenting X Child Temperament</i> |                                                                                                                                                                                                                                                                                                                                                                                                                                                                                                                                                                                                                                                                                                                                                                                                        |               |                |
| Warm Parenting X RTC                 | NA                                                                                                                                                                                                                                                                                                                                                                                                                                                                                                                                                                                                                                                                                                                                                                                                     | --            | NA             |
| Harsh Parenting X RTC                | NA                                                                                                                                                                                                                                                                                                                                                                                                                                                                                                                                                                                                                                                                                                                                                                                                     | --            | NA             |



|                                | Maximum Score                                                                                                                                                                                                                                                                                                                                                                                          | Mother Report                                                                                                                                                                                                                                             | Teacher Report                                                                                                                                                                                                                                                                                                                                                                           |
|--------------------------------|--------------------------------------------------------------------------------------------------------------------------------------------------------------------------------------------------------------------------------------------------------------------------------------------------------------------------------------------------------------------------------------------------------|-----------------------------------------------------------------------------------------------------------------------------------------------------------------------------------------------------------------------------------------------------------|------------------------------------------------------------------------------------------------------------------------------------------------------------------------------------------------------------------------------------------------------------------------------------------------------------------------------------------------------------------------------------------|
| <i>Stress X Parenting</i>      |                                                                                                                                                                                                                                                                                                                                                                                                        |                                                                                                                                                                                                                                                           |                                                                                                                                                                                                                                                                                                                                                                                          |
| Warm Parenting X RTC           | --                                                                                                                                                                                                                                                                                                                                                                                                     | --                                                                                                                                                                                                                                                        | --                                                                                                                                                                                                                                                                                                                                                                                       |
| Harsh Parenting X RTC          | --                                                                                                                                                                                                                                                                                                                                                                                                     | --                                                                                                                                                                                                                                                        | --                                                                                                                                                                                                                                                                                                                                                                                       |
| <i>Early Social Preference</i> | -*                                                                                                                                                                                                                                                                                                                                                                                                     | -*                                                                                                                                                                                                                                                        | -*                                                                                                                                                                                                                                                                                                                                                                                       |
| Modeling decision              | Early social preference is associated with reduction in dysregulation, but the effect of harsh parenting diminished and is no longer significant. Early social preference is still significantly predictive if harsh is dropped from the model, but the full model with harsh parenting still included fits significantly better than the reduced model ( $\chi^2 = 2687.6$ , $df = 1$ , $p < .001$ ). | Early social preference is associated with reduction in dysregulation, and the full model with early social preference fits significantly better than the reduced model with only RTC and growth parameters ( $\chi^2 = 1718.5$ , $df = 1$ , $p < .001$ ) | Early social preference is associated with reduction in dysregulation, but the effect of warm parenting diminished and is no longer significant. Early social preference is still significantly predictive if warmth is dropped from the model, and the full model with social preference fits significantly better than the reduced model ( $\chi^2 = 484.1$ , $df = 1$ , $p < .001$ ). |
| <i>Early Language Ability</i>  | -*                                                                                                                                                                                                                                                                                                                                                                                                     | --                                                                                                                                                                                                                                                        | -*                                                                                                                                                                                                                                                                                                                                                                                       |
| Modeling decision              | More advanced early language ability is associated with reduction in dysregulation, and the inclusion of this predictor significantly improves model fit ( $\chi^2 = 2122$ , $df = 1$ , $p < .001$ ).                                                                                                                                                                                                  |                                                                                                                                                                                                                                                           | More advanced early language ability is associated with reduction in dysregulation, and the inclusion of this predictor significantly improves model fit ( $\chi^2 = 385.4$ , $df = 1$ , $p < .001$ ).                                                                                                                                                                                   |

*Note.* \*significant predictors based on conventional p values. + or – reflect the direction of effect. --non-significant effect. Temperament was used to predict the intercept. All other predictors predicted change in dysregulation. Parenting X temperament was only tested for mother-reported dysregulation, which showed no main effect of parenting.

**Table S.7.** Summary Heat Map of Correlations between Dysregulation, Externalizing, and Internalizing Scales and Outcomes

|        | Best Friend | Friend Support | Employment Status  | Long Unemp.       | Promotions | Fired/Laid Off | Arrested          | Convicted         | Young Age at Arrest | Highest Education | SACA              | Suicidality | Drug Problem      | DIS               | DIS INT           | DIS EXT |
|--------|-------------|----------------|--------------------|-------------------|------------|----------------|-------------------|-------------------|---------------------|-------------------|-------------------|-------------|-------------------|-------------------|-------------------|---------|
| M DP   |             | -0.17          |                    | 0.09 <sup>^</sup> |            | 0.17           | 0.19              |                   |                     | -0.16             |                   | 0.11        | 0.16              | 0.22              | 0.15              | 0.21    |
| T DP   | -0.13       | -0.23          |                    | 0.15              |            | 0.27           | 0.31              | 0.15 <sup>^</sup> | -0.16 <sup>^</sup>  | -0.39             | 0.13              | 0.18        | 0.16              | 0.19              |                   | 0.22    |
| DP Max | -0.12       | -0.23          |                    | 0.12              |            | 0.25           | 0.27              |                   | -0.18               | -0.30             |                   | 0.16        | 0.17              | 0.24              | 0.15              | 0.23    |
| M Cat  |             | -0.12          |                    | 0.11              |            | 0.14           | 0.08 <sup>^</sup> |                   | -0.15 <sup>^</sup>  | -0.13             |                   | 0.13        | 0.10              | 0.15              | 0.08 <sup>^</sup> | 0.15    |
| T Cat  |             | -0.16          | -0.07 <sup>^</sup> | 0.17              |            | 0.19           | 0.23              |                   |                     | -0.27             | 0.15              | 0.27        | 0.11              | 0.08 <sup>^</sup> |                   |         |
| M EXT  |             | -0.16          |                    | 0.10              |            | 0.19           | 0.21              |                   | -0.15 <sup>^</sup>  | -0.23             | 0.08 <sup>^</sup> | 0.11        | 0.22              | 0.26              | 0.14              | 0.29    |
| T EXT  | -0.14       | -0.17          | -0.08 <sup>^</sup> | 0.10              |            | 0.23           | 0.36              |                   | -0.21               | -0.33             | 0.15              | 0.15        | 0.17              | 0.16              |                   | 0.22    |
| M INT  |             | -0.12          |                    |                   |            |                | 0.08 <sup>^</sup> |                   |                     |                   |                   | 0.17        | 0.09 <sup>^</sup> | 0.24              | 0.22              | 0.18    |
| T INT  | -0.11       | -0.16          | -0.08              | 0.14              |            | 0.21           |                   |                   |                     | -0.26             | 0.10              | 0.17        |                   | 0.13              | 0.16              |         |

*Note:* All correlations at  $p < 0.05$ , two-tailed. Green represents stronger positive correlations, and red indicates stronger negative correlations. M DP refers to mother-reported dysregulation score, T DP refers to teacher-reported dysregulation score, and DP Max refers to the maximum score. M Cat refers to mother-reported categorical measure of dysregulation. T Cat refers to teacher-reported categorical measure of dysregulation. M EXT refers to mother-reported externalizing, T EXT refers to teacher-reported externalizing, M INT refers to mother-reported internalizing, and T INT refers to teacher-reported internalizing score. Correlations trending towards significance are represented by <sup>^</sup>. DIS refers to the Diagnostic Interview Schedule, which was used to determine the number of psychiatric disorders for which participants met full or partial diagnostic criteria.

**Table S.8.** Correlations among Mother and Teacher Reported Internalizing, Externalizing, and Primary Dysregulation Measures

|                                       | Mother<br>Dysregulation <sup>a</sup> | Teacher<br>Dysregulation <sup>a</sup> | Maximum<br>Score <sup>a</sup> | Mother<br>Internalizing <sup>a</sup> | Mother<br>Externalizing <sup>a</sup> | Teacher<br>Internalizing <sup>a</sup> | Teacher<br>Externalizing <sup>a</sup> |
|---------------------------------------|--------------------------------------|---------------------------------------|-------------------------------|--------------------------------------|--------------------------------------|---------------------------------------|---------------------------------------|
| Mother<br>Dysregulation <sup>a</sup>  | 1.00 <sup>b</sup>                    |                                       |                               |                                      |                                      |                                       |                                       |
| Teacher<br>Dysregulation <sup>a</sup> | 0.48 <sup>c</sup>                    | 1.00 <sup>d</sup>                     |                               |                                      |                                      |                                       |                                       |
| Maximum Score <sup>a</sup>            | 0.86 <sup>b</sup>                    | 0.82 <sup>d</sup>                     | 1.00 <sup>e</sup>             |                                      |                                      |                                       |                                       |
| Mother<br>Internalizing <sup>a</sup>  | 0.80 <sup>b</sup>                    | 0.22 <sup>c</sup>                     | 0.59 <sup>b</sup>             | 1.00 <sup>b</sup>                    |                                      |                                       |                                       |
| Mother<br>Externalizing <sup>a</sup>  | 0.87 <sup>b</sup>                    | 0.53 <sup>c</sup>                     | 0.80 <sup>b</sup>             | 0.63 <sup>b</sup>                    | 1.00 <sup>b</sup>                    |                                       |                                       |
| Teacher<br>Internalizing <sup>a</sup> | 0.34 <sup>c</sup>                    | 0.63 <sup>d</sup>                     | 0.56 <sup>d</sup>             | 0.35 <sup>c</sup>                    | 0.27 <sup>c</sup>                    | 1.00 <sup>d</sup>                     |                                       |
| Teacher<br>Externalizing <sup>a</sup> | 0.37 <sup>c</sup>                    | 0.88 <sup>d</sup>                     | 0.70 <sup>d</sup>             | 0.11 <sup>c</sup>                    | 0.52 <sup>c</sup>                    | 0.36 <sup>d</sup>                     | 1.00 <sup>d</sup>                     |

*Note:* Each cell includes the total sample size of unique participants. All correlations are significant at  $p < 0.05$ , two-tailed.

<sup>a</sup> Represents the average score across child ages 5 to 13.

<sup>b</sup> Indicates a sample size of 583 participants.

<sup>c</sup> Indicates a sample size of 580 participants.

<sup>d</sup> Indicates a sample size of 581 participants.

<sup>e</sup> Indicates a sample size of 584 participants.

**Table S.9.** Correlation Between Dysregulation Measures

|                                           | Average<br>Mother | Average<br>Teacher | <b>Max<br/>DP</b> | <b>Evenly<br/>Weighted<br/>Mother</b> | <b>Evenly<br/>Weighted<br/>Teacher</b> | Continuous<br>T-Score<br>Mother DP | Continuous<br>T-Score<br>Teacher | Multiplicative<br>Mother DP | Multiplicative<br>Teacher DP | Categorical<br>Score<br>Mother DP | Categorical<br>Score<br>Teacher DP |
|-------------------------------------------|-------------------|--------------------|-------------------|---------------------------------------|----------------------------------------|------------------------------------|----------------------------------|-----------------------------|------------------------------|-----------------------------------|------------------------------------|
| Average<br>Mother DP                      | 1.00 <sup>c</sup> |                    |                   |                                       |                                        |                                    |                                  |                             |                              |                                   |                                    |
| Average<br>Teacher DP                     | 0.47 <sup>a</sup> | 1.00 <sup>b</sup>  |                   |                                       |                                        |                                    |                                  |                             |                              |                                   |                                    |
| <b>Max DP</b>                             | 0.85 <sup>a</sup> | 0.81 <sup>b</sup>  | 1.00 <sup>d</sup> |                                       |                                        |                                    |                                  |                             |                              |                                   |                                    |
| <b>Evenly<br/>Weighted<br/>Mother DP</b>  | 1.00 <sup>c</sup> | 0.47 <sup>a</sup>  | 0.86 <sup>c</sup> | 1.00 <sup>c</sup>                     |                                        |                                    |                                  |                             |                              |                                   |                                    |
| <b>Evenly<br/>Weighted<br/>Teacher DP</b> | 0.47 <sup>a</sup> | 1.00 <sup>b</sup>  | 0.82 <sup>b</sup> | 0.48 <sup>a</sup>                     | 1.00 <sup>b</sup>                      |                                    |                                  |                             |                              |                                   |                                    |
| Continuous<br>T-Score<br>Mother DP        | 0.97 <sup>c</sup> | 0.44 <sup>a</sup>  | 0.83 <sup>c</sup> | 0.98 <sup>c</sup>                     | 0.45 <sup>a</sup>                      | 1.00 <sup>c</sup>                  |                                  |                             |                              |                                   |                                    |
| Continuous<br>T-Score<br>Teacher DP       | 0.46 <sup>a</sup> | 0.95 <sup>b</sup>  | 0.79 <sup>b</sup> | 0.47 <sup>a</sup>                     | 0.96 <sup>b</sup>                      | 0.46 <sup>a</sup>                  | 1.00 <sup>b</sup>                |                             |                              |                                   |                                    |
| Multiplicative<br>Mother DP               | 0.97 <sup>c</sup> | 0.46 <sup>a</sup>  | 0.83 <sup>c</sup> | 0.97 <sup>c</sup>                     | 0.47 <sup>a</sup>                      | 0.98 <sup>c</sup>                  | 0.46 <sup>a</sup>                | 1.00 <sup>c</sup>           |                              |                                   |                                    |
| Multiplicative<br>Teacher DP              | 0.45 <sup>a</sup> | 0.97 <sup>b</sup>  | 0.80 <sup>b</sup> | 0.46 <sup>a</sup>                     | 0.98 <sup>b</sup>                      | 0.44 <sup>a</sup>                  | 0.96 <sup>b</sup>                | 0.46 <sup>a</sup>           | 1.00 <sup>b</sup>            |                                   |                                    |
| Categorical<br>Score Mother<br>DP         | 0.71 <sup>c</sup> | 0.32 <sup>b</sup>  | 0.62 <sup>d</sup> | 0.71 <sup>c</sup>                     | 0.32 <sup>b</sup>                      | 0.76 <sup>c</sup>                  | 0.33 <sup>b</sup>                | 0.79 <sup>b</sup>           | 0.32 <sup>b</sup>            | 1.00                              |                                    |
| Categorical<br>Score Teacher<br>DP        | 0.32 <sup>c</sup> | 0.66 <sup>b</sup>  | 0.55 <sup>d</sup> | 0.32 <sup>c</sup>                     | 0.66 <sup>b</sup>                      | 0.33 <sup>c</sup>                  | 0.74 <sup>b</sup>                | 0.33 <sup>c</sup>           | 0.73 <sup>b</sup>            | 0.29 <sup>d</sup>                 | 1.00                               |

Note: All correlations are significant at  $p < 0.05$ , two-tailed. Each variable is averaged across child ages 5-13. Averages refer to simple means of the AAA subscales of the CBCL and TRF. Evenly weighted measures refer to our measure of dysregulation, in which the average item rating per subscale was summed. Multiplicative measures refer to the product of the re-scaled average item rating for each subscale, multiplied together. All values have been rounded to two decimal places, so although average and evenly weighted DP are highly correlated, they are not perfectly correlated as shown above. The three primary measures of dysregulation have been bolded. <sup>a</sup> Indicates a sample size of 579 unique participants. <sup>b</sup> Indicates a sample size of 581 unique participants. <sup>c</sup> Indicates a sample size of 582 unique participants. <sup>d</sup> Indicates a sample size of 584 unique participants.

**Table S.10.** Heat Map of Correlations of Multiplicative Dysregulation with Adjustment Outcomes

|             | Best Friend | Friend Support | Employment Status | Long Unemp. | Promotions | Fired Laid Off | Arrested | Convicted | Young Age at Arrest | Highest Ed. | SACA | Suicidality | Drug Prob. | DIS   | DIS INT | DIS EXT |
|-------------|-------------|----------------|-------------------|-------------|------------|----------------|----------|-----------|---------------------|-------------|------|-------------|------------|-------|---------|---------|
| M5 Multi    |             | -0.23          |                   |             |            | 0.14           |          |           |                     | -0.10^      |      | 0.09        |            | 0.09  |         |         |
| M6 Multi    |             | -0.15          |                   |             |            | 0.15           | 0.15     |           |                     | -0.16       |      | 0.09^       | 0.13       | 0.16  | 0.12    | 0.16    |
| M7 Multi    |             |                |                   |             |            | 0.13           | 0.13     | -0.18^    |                     | -0.17       |      |             | 0.12       | 0.18  |         | 0.20    |
| M8 Multi    |             | -0.11          | -0.11             | 0.12        |            | 0.17           | 0.11     |           |                     | -0.19       |      | 0.09^       | 0.12       | 0.00  | 0.10^   | 0.18    |
| M9 Multi    |             | -0.12          | -0.09^            |             |            | 0.11^          | 0.11     | -0.24     | -0.22               | -0.11^      |      | 0.13        |            | 0.12  |         | 0.12    |
| M10 Multi   |             | -0.15          |                   |             |            | 0.15           | 0.12     |           | -0.18               |             |      |             |            | 0.15  |         | 0.16    |
| M11 Multi   | -0.09^      | -0.17          |                   |             |            | 0.19           | 0.19     |           | -0.19               | -0.17       |      | 0.11        | 0.16       | 0.17  | 0.11    | 0.16    |
| M12 Multi   |             | -0.14          |                   | 0.14        |            | 0.12           | 0.16     |           | -0.21               | -0.18       |      | 0.11        | 0.20       | 0.23  | 0.16    | 0.21    |
| M13 Multi   |             | -0.08          |                   |             |            | 0.11^          | 0.17     |           |                     | -0.14       |      | 0.12        | 0.13       | 0.19  | 0.15    | 0.17    |
| Avg M Multi |             | -0.17          |                   |             |            | 0.16           | 0.17     |           |                     | -0.15       |      | 0.13        | 0.16       | 0.20  | 0.13    | 0.20    |
| T5 Multi    | -0.09       | 0.18           | -0.08^            | 0.13        |            | 0.15           | 0.11     |           |                     | -0.23       |      | 0.13        |            | 0.10  |         | 0.09^   |
| T6 Multi    | -0.11       | -0.21          |                   |             | 0.09^      | 0.15           | 0.18     |           |                     | -0.26       |      |             | 0.12       |       |         | 0.11    |
| T7 Multi    | -0.10       | -0.18          | -0.09             | 0.22        |            | 0.17           | 0.13     |           | -0.17^              | -0.28       |      | 0.16        |            | 0.13  |         | 0.14    |
| T8 Multi    |             | -0.20          | -0.12             | 0.16        |            | 0.25           | 0.20     |           |                     | -0.24       | 0.12 | 0.25        |            | 0.13  | 0.10    | 0.12    |
| T9 Multi    | -0.14       | -0.13          | -0.09^            | 0.14        |            | 0.23           | 0.30     |           |                     | -0.25       |      | 0.18        | 0.15       | 0.12  |         | 0.12    |
| T10 Multi   | -0.12       | -0.20          |                   | 0.21        |            | 0.24           | 0.16     | 0.20      | -0.21               | -0.28       |      | 0.13        |            | 0.09^ |         | 0.09^   |
| T11 Multi   | -0.09^      | -0.20          |                   |             |            | 0.29           | 0.24     |           |                     | -0.32       | 0.16 | 0.11        | 0.18       | 0.09^ |         | 0.12    |
| T12 Multi   | -0.09^      | -0.12          |                   | 0.12        |            | 0.12           | 0.15     |           |                     | -0.31       | 0.12 | 0.17        | 0.10^      |       |         |         |
| T13 Multi   | -0.09^      | -0.09^         | -0.09^            |             | 0.19       | 0.13           | 0.32     |           |                     | -0.33       | 0.12 | 0.09^       | 0.09^      | 0.20  |         | 0.25    |
| Avg T Multi | -0.12       | -0.23          | -0.08^            | 0.17        |            | 0.27           | 0.29     | 0.15^     |                     | -0.37       | 0.13 | 0.21        | 0.15       | 0.17  |         | 0.19    |

*Note:* All correlations at  $p < 0.05$ , two-tailed. Correlations trending towards significance are represented by ^. Green represents stronger positive correlations, and red indicates stronger negative correlations. M Multi refers to mother-reported dysregulation score, when the average item rating for each subscale is re-scaled and multiplied. T Multi refers to teacher-reported dysregulation score, when the average item rating for each subscale is re-scaled and multiplied. Avg M and Avg T Multi refer to the average multiplicative score for mother reported and teacher reported AAA scales across ages 5 – 13.
